# Supplementary material for: CGP57380 enhances efficacy of RAD001 in non-small cell lung cancer through abrogating mTOR inhibition-induced phosphorylation of eIF4E and activating mitochondrial apoptotic pathway
Source: PubMed Central journal article supplement (PMC5053688; doi:10.18632/oncotarget.8497), 2016-03-30
Supplement: oncotarget-07-27787-s001.pdf [file oncotarget-07-27787-s001.pdf]

## SUPPLEMENTARY FIGURES AND TABLES

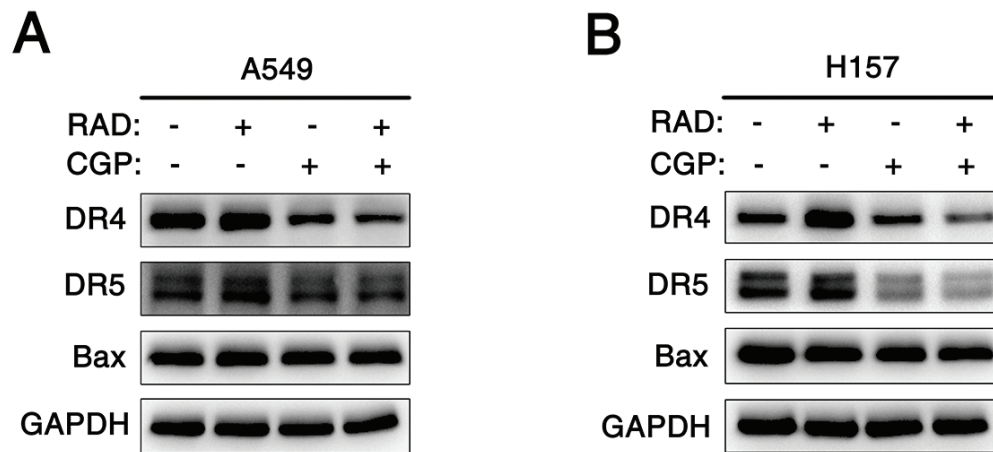

**Supplementary Figure S1: Detection of DR4, DR5 and Bax levels in A549 and H157 cells.** Western blotting analysis of DR4, DR5 and Bax in A549 **A**, and H157 **B**. Cells were treated with 25nM RAD001 (RAD) alone, 25 $\mu$ M CGP57380 (CGP) alone and their combination for 24 h. GAPDH served as a loading control.

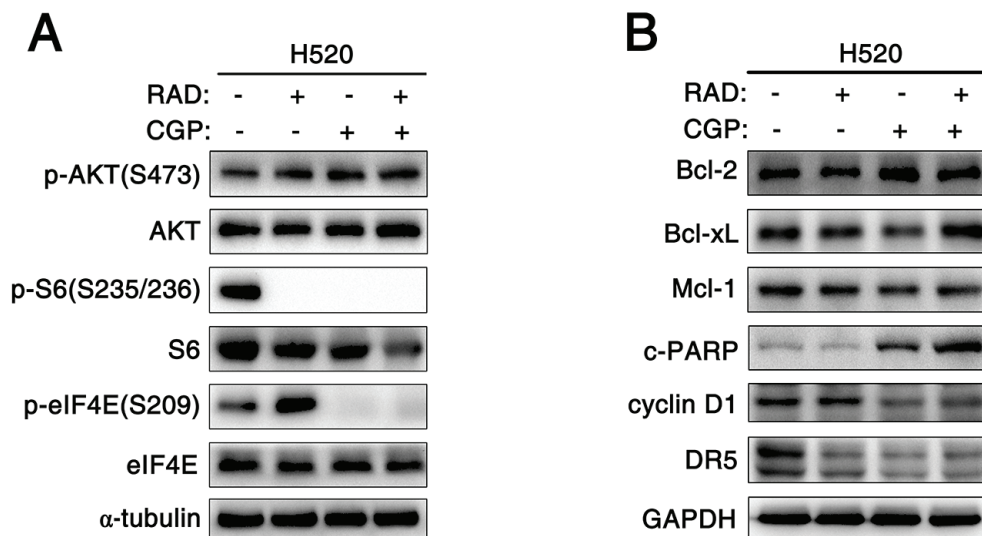

**Supplementary Figure S2: Mnk1 inhibitor CGP57380 abrogates the eIF4E phosphorylation induced by mTOR inhibitor RAD001 and the combination of CGP57380 and RAD001 elicits apoptosis in H520 cells.** A-B. H520 cells were treated with 25nM RAD001 (RAD) alone, 25 $\mu$ M CGP57380 (CGP) alone and their combination for 24 h. Then cell lysates were collected and subjected to western blotting for the indicated proteins.  $\alpha$ -tubulin or GAPDH was used as a loading control.

**Supplementary Table S1: Clinicopathological characteristics of studied 353 cases of non-small cell lung cancer (NSCLC) patients**

| <b>Patients characteristics</b> | <b>No. of patients (%)</b> |
|---------------------------------|----------------------------|
| <b>Age(years)</b>               |                            |
| ≤50                             | 98(27.8)                   |
| >50                             | 255(72.2)                  |
| <b>Gender</b>                   |                            |
| Male                            | 267(75.6)                  |
| Female                          | 86(24.4)                   |
| <b>Clinical stages</b>          |                            |
| Stage I                         | 78(22.1)                   |
| Stage II                        | 72(20.4)                   |
| Stage III                       | 169(47.9)                  |
| Stage IV                        | 34(9.6)                    |
| <b>Lymph node status</b>        |                            |
| N0                              | 142(40.2)                  |
| N1/N2/N3                        | 211(59.8)                  |
| <b>Histological type</b>        |                            |
| SCC                             | 159(45.0)                  |
| ADC                             | 194(55.0)                  |
| <b>Pathological grades</b>      |                            |
| Well                            | 6(1.7)                     |
| Moderate                        | 144(40.8)                  |
| Poor                            | 203 (57.5)                 |

**Supplementary Table S2: Analysis of the association between expression of p-Mnk1 and p-eIF4E proteins and clinicopathological features of NSCLC (n=353)**

| Clinicopathological features (n) | p-Mnk1    |          |         | p-eIF4E   |           |         | p-Mnk1 / p-eIF4E <sup>#</sup> |                    |         |
|----------------------------------|-----------|----------|---------|-----------|-----------|---------|-------------------------------|--------------------|---------|
|                                  | P (%)     | N (%)    | P-value | P (%)     | N (%)     | P-value | P <sup>+</sup> (%)            | N <sup>-</sup> (%) | P-value |
| <b>Age(years)</b>                |           |          |         |           |           |         |                               |                    |         |
| ≤50 (n=98)                       | 71(72.4)  | 27(27.6) |         | 48(49.0)  | 50(51.0)  |         | 46(46.9)                      | 52(53.1)           |         |
| >50 (n=255)                      | 161(63.1) | 94(36.9) | 0.099   | 138(54.1) | 117(45.9) | 0.387   | 114(44.7)                     | 141(55.3)          | 0.706   |
| <b>Gender</b>                    |           |          |         |           |           |         |                               |                    |         |
| Male(n=267)                      | 171(64.0) | 96(36.0) |         | 138(51.7) | 129(48.3) |         | 119(44.6)                     | 148(55.4)          |         |
| Female(n=86)                     | 61(70.9)  | 25(29.1) | 0.242   | 48(55.8)  | 38(44.2)  | 0.505   | 41(47.7)                      | 45(52.3)           | 0.615   |
| <b>Clinical stages</b>           |           |          |         |           |           |         |                               |                    |         |
| Stage <sub>I-II</sub> (n=150)    | 92(61.3)  | 58(38.7) |         | 79(52.7)  | 71(47.3)  |         | 63(42.0)                      | 87(58.0)           |         |
| Stage <sub>III-IV</sub> (n=203)  | 140(69.0) | 63(31.0) | 0.135   | 107(52.7) | 96(47.3)  | 0.994   | 97(47.8)                      | 106(52.2)          | 0.281   |
| <b>LN status</b>                 |           |          |         |           |           |         |                               |                    |         |
| LNM (n=211)                      | 141(66.8) | 70(33.2) |         | 115(54.5) | 96(45.5)  |         | 102(48.3)                     | 109(51.7)          |         |
| No LNM (n=142)                   | 91(64.1)  | 51(35.9) | 0.595   | 71(50.0)  | 71(50.0)  | 0.406   | 58(40.8)                      | 84(59.2)           | 0.165   |
| <b>Histological type</b>         |           |          |         |           |           |         |                               |                    |         |
| SCC(n=159)                       | 95(59.7)  | 64(40.3) |         | 67(42.1)  | 92(57.9)  |         | 57(35.8)                      | 102(64.2)          |         |
| ADC(n=194)                       | 137(70.6) | 57(29.4) | 0.032*  | 119(61.3) | 75(38.7)  | 0.000*  | 103(53.1)                     | 91(46.9)           | 0.001*  |
| <b>Pathological grade</b>        |           |          |         |           |           |         |                               |                    |         |
| Well (n=6)                       | 6(100.0)  | 0(0.0)   |         | 5(83.3)   | 1(16.7)   |         | 5(83.3)                       | 1(16.7)            |         |
| Moderate(n=144)                  | 93(64.6)  | 51(35.4) |         | 72(50.0)  | 72(50.0)  |         | 63(43.8)                      | 81(56.3)           |         |
| Poor (n=203)                     | 133(65.5) | 70(34.5) | 0.200   | 109(53.7) | 94(46.3)  | 0.252   | 92(45.3)                      | 111(54.7)          | 0.162   |
| <b>Survival status</b>           |           |          |         |           |           |         |                               |                    |         |
| Alive(n=186)                     | 107(57.5) | 79(42.5) |         | 84(45.2)  | 102(54.8) |         | 68(36.6)                      | 118(63.4)          |         |
| Dead(n=167)                      | 125(74.9) | 42(25.1) | 0.001*  | 102(61.1) | 65(38.9)  | 0.003*  | 92(55.1)                      | 75(44.9)           | 0.000*  |

\*Chi-square test, statistically significant difference ( $P < 0.05$ ). Abbreviations: LNM, lymph node metastasis; SCC, squamous cell carcinoma; P, Positive; N, Negative; #P<sup>+</sup>, common positive

**Supplementary Table S3: The pairwise association between expression of p-Mnk1 and p-eIF4E proteins in 353 cases of NSCLC by Spearman's rank correlation test**

|                | p-Mnk1       |              | <i>P</i> -value     |
|----------------|--------------|--------------|---------------------|
|                | Positive (%) | Negative (%) |                     |
| <b>p-eIF4E</b> |              |              |                     |
| Positive (%)   | 160(86.0)    | 26(14.0)     | 0.000               |
| Negative (%)   | 72(43.1)     | 95(56.9)     | ( <i>r</i> = 0.451) |

\*Spearman's rank correlation test, statistically significant difference ( $P < 0.05$ )
